# Supplementary material for: Urbanization Imprint on Soil Bacterial Communities in Forests and Grasslands
Source: MDPI journal article supplement (doi:10.3390/f14010038), 2022-12-25
Supplement: s1 [file s1]

**Table S1.** The longitude, latitude and urbanization intensity of the 18 sample plots. RP1-RP6 represent rural plots, SP1-SP6 represent suburban plots, UP1-UP6 represent urban plots. R1, R2, R3 and R4 represent the urbanization intensity at 250 m, 1 km, 2 km and 5 km resolution, respectively.

|     | Plots                           | longitude | latitude | R1     | R2     | R3     | R4     |
|-----|---------------------------------|-----------|----------|--------|--------|--------|--------|
| RP1 | Heimi Park                      | 113.005   | 28.4447  | 0      | 0      | 0.0048 | 0      |
| RP2 | Shiyan Hu Park                  | 113.0802  | 28.016   | 0.0992 | 0      | 0      | 0.4336 |
| RP3 | Xiangtan Tangwan Village        | 112.6568  | 27.8717  | 0.0192 | 0.0352 | 0      | 0.0144 |
| RP4 | FengShu Ridge                   | 112.8714  | 27.7983  | 0.0464 | 0.0464 | 0.0064 | 0.0624 |
| RP5 | Zhuzhou Dajin Scenic Spot       | 113.2528  | 27.8485  | 0      | 0.1424 | 0      | 0      |
| RP6 | TaoHua Hill                     | 112.8934  | 28.1805  | 0.2048 | 0      | 0      | 0.0912 |
| SP1 | The jing port Town              | 112.7781  | 28.4606  | 0.5488 | 0.096  | 0.1888 | 0.0384 |
| SP2 | DaWang Mountain                 | 112.9123  | 28.0728  | 0.4528 | 0.1824 | 0.0912 | 0.0144 |
| SP3 | Lion Rock Park                  | 112.7113  | 28.2379  | 0.0032 | 0      | 0.0528 | 0.0208 |
| SP4 | Changsha Garden Ecological Park | 113.0392  | 28.2958  | 0.056  | 0.2496 | 0.0368 | 0.0032 |
| SP5 | Luojia zui                      | 113.1282  | 27.9022  | 0.1072 | 0.5712 | 0.2864 | 0.4704 |
| SP6 | The martyr Park                 | 112.9927  | 28.2095  | 0.32   | 0.1136 | 0.1536 | 0.5248 |
| UP1 | YangHu Wetland                  | 112.9271  | 28.1284  | 0.1952 | 0.0144 | 0.6544 | 0.6592 |
| UP2 | Changsha Botanical Garden       | 113.0313  | 28.1065  | 0.0832 | 0.2416 | 0.3392 | 0.5664 |
| UP3 | Huxiang Park                    | 112.9363  | 27.8397  | 0.08   | 0.5408 | 0.9264 | 0.2976 |
| UP4 | Juhua Tong Park                 | 112.908   | 27.8321  | 0.5952 | 0.832  | 0.6464 | 0.2976 |
| UP5 | Baishi Park                     | 112.8933  | 27.857   | 0.6    | 0.9792 | 0.832  | 0.7408 |
| UP6 | LiYu Leisure Valley             | 113.0714  | 27.8377  | 0.6576 | 0.152  | 0.6624 | 0.1456 |

**Table S2.** The relative abundance of soil bacterial communities at phylum (top10) and order (top19) ranks (%). RF, SF, UF, RG, SG and UG represent rural forestland, suburban forestland, urban forestland, rural grassland, suburban grassland and urban grassland, respectively. Significant differences ( $p < 0.05$ ) among treatments are shown with different letters. The differences were tested using one-way analysis of variance (ANOVA) and followed by post-hoc Tukey Honestly Significant Difference (HSD) tests for significance.

| Taxa  |               | Forestland |         |         |      | Grassland |        |         |   |
|-------|---------------|------------|---------|---------|------|-----------|--------|---------|---|
|       |               | RF         | SF      | UF      | RG   | SG        | UG     |         |   |
| Phylu |               | 42.75      | ± 32.13 | ± 23.71 | ± 25 | ± 2.15    | 20.74  | ± 20.12 | ± |
| m     | Acidobacteria | 3.45 a     | 3.72 b  | 2.71 bc | bc   |           | 1.76 c | 1.84 c  |   |

|           |                           |                |                      |                |                 |                |                 |
|-----------|---------------------------|----------------|----------------------|----------------|-----------------|----------------|-----------------|
| Orde<br>r | Proteobacteria            | 26.7 ± 1.86 ab | 29.41 ± 2.22 ab      | 32.02 ± 1.87 a | 32.12 ± 2.89 a  | 32.09 ± 2.65 a | 33.12 ± 2.57 a  |
|           | Chloroflexi               | 9.82 ± 2.31 ab | 12.63 ± 13.6 ± 2.2 a | 11.34 ± 1.28 a | 12.08 ± 1.67 a  | 15.17 ± 1.27 a | 1.87 a          |
|           | Actinobacteria            | 8.43 ± 0.9 ab  | 10.47 ± 2.08 a       | 9.69 ± 1.56 ab | 5.58 ± 0.94 b   | 12.17 ± 1.8 a  | 10.14 ± 1.47 ab |
|           | Verrucomicrobia           | 4.59 ± 0.69 ab | 3.74 ± 0.62 b        | 5.11 ± 0.75 ab | 6.67 ± 0.82 a   | 5.84 ± 0.73 ab | 5.3 ± 0.63 ab   |
|           | Bacteroidetes             | 2.51 ± 0.51 b  | 3.08 ± 0.46 b        | 7.28 ± 0.95 a  | 6.04 ± 1.19 a   | 5.58 ± 0.81 a  | 6 ± 0.67 a      |
|           | Gemmatimonadetes          | 2.12 ± 0.6 b   | 2.35 ± 0.42 ab       | 4.07 ± 0.59 ab | 4.5 ± 1.12 a    | 4.46 ± 0.68 a  | 3.85 ± 0.46 ab  |
|           | Latescibacteria           | 0.17 ± 0.07 c  | 0.84 ± 0.32 bc       | 1.46 ± 0.44 ab | 1.03 ± 0.99 bc  | 1.35 ± 0.23 ab | 1.69 ± 0.26 a   |
|           | Nitrospirae               | 0.35 ± 0.11 c  | 0.68 ± 0.23 bc       | 1.25 ± 0.34 b  | 3.2 ± 0.24 a    | 0.91 ± 0.37 b  | 0.65 ± 0.39 b   |
|           | Planctomycetes            | 0.61 ± 0.08 c  | 0.65 ± 0.11 bc       | 0.63 ± 0.09 bc | 0.96 ± 0.16 abc | 1.06 ± 0.19 ab | 1.16 ± 0.17 a   |
|           | Acidobacteriales          | 16.77 ± 2.08 a | 9.03 ± 1.66 bc       | 4.62 ± 1.45 cd | 9.45 ± 1.92 b   | 4.6 ± 1.03 cd  | 3.69 ± 1.19 d   |
|           | Acidobacteriia_Subgroup_2 | 15.27 ± 0.65a  | 13.09 ± 0.37a        | 5.14 ± 0.48b   | 4.91 ± 1.16b    | 5.33 ± 1.99b   | 1.88 ± 0.75c    |
|           | Solibacterales            | 7.51 ± 2.53a   | 5.07 ± 2.75b         | 4.26 ± 1.99b   | 4.97 ± 0.67ab   | 3.36 ± 0.53b   | 2.85 ± 0.68b    |
|           | Rhizobiales               | 7 ± 0.68a      | 5 ± 0.79a            | 5.85 ± 0.94a   | 6.13 ± 0.73a    | 4.57 ± 0.24a   | 4.87 ± 0.36b    |
|           | Ktedonobacterales         | 5.74 ± 0.51a   | 3.78 ± 1.1ab         | 2.45 ± 0.44b   | 2.55 ± 1.36b    | 2.5 ± 0.98b    | 1.52 ± 1.6b     |
|           | Elsterales                | 4.64 ± 0.33a   | 4.24 ± 0.27ab        | 1.75 ± 0.25b   | 1.43 ± 0.85bc   | 1.87 ± 0.78b   | 0.96 ± 0.39c    |
|           | Frankiales                | 3.77 ± 0.6a    | 2.84 ± 0.69ab        | 1.58 ± 0.41bc  | 0.89 ± 0.23bc   | 1.41 ± 0.75bc  | 0.85 ± 0.16c    |
|           | Pedosphaerales            | 3.11 ± 1.84b   | 2.86 ± 1b            | 3.26 ± 0.64b   | 4.81 ± 0.15a    | 3.76 ± 0.3a    | 3.47 ± 0.18a    |
|           | Betaproteobacteriales     | 2.73 ± 0.16c   | 7.03 ± 0.13bc        | 10.18 ± 0.15a  | 8.57 ± 0.6bc    | 9.7 ± 0.53ab   | 11.29 ± 0.45a   |

|                     |             |   |             |   |             |   |             |   |        |   |             |   |
|---------------------|-------------|---|-------------|---|-------------|---|-------------|---|--------|---|-------------|---|
|                     | 2.23        | ± |             |   | 0.96        | ± | 1.07        | ± | 0.6    | ± | 0.58        | ± |
| Micropepsales       | 0.32a       |   | 1.3 ± 0.23a |   | 0.21a       |   | 1.09a       |   | 1.37a  |   | 1.43a       |   |
|                     | 2.11        | ± | 2.28        | ± | 3.97        | ± | 4.46        | ± | 4.28   | ± | 3.74        | ± |
| Gemmatimonadales    | 0.49b       |   | 0.48ab      |   | 0.53ab      |   | 0.22a       |   | 0.14a  |   | 0.17ab      |   |
| Gammaproteobacteria | 1.79        | ± |             |   | 0.77        | ± | 0.79        | ± | 0.79   | ± | 0.58        | ± |
|                     | 0.6a        |   | 1.11 ± 0.4a |   | 0.58ab      |   | 1.07bc      |   | 0.66bc |   | 0.45c       |   |
|                     |             |   | 2.83        | ± |             |   | 4.56        | ± | 5.47   | ± | 5.53        | ± |
| Myxococcales        | 1.5 ± 0.28c |   | 0.56bc      |   | 3.88 ± 0.5b |   | 0.17a       |   | 0.17a  |   | 0.09a       |   |
|                     | 1.31        | ± | 0.65        | ± |             |   | 1.32        | ± | 1.49   | ± | 1.14        | ± |
| Chthoniobacterales  | 0.54b       |   | 1.75b       |   | 1.4 ± 1.58b |   | 0.63b       |   | 0.59a  |   | 0.46b       |   |
|                     | 1.3         | ± |             |   | 2.54        | ± |             |   | 0.97   | ± | 1.06        | ± |
| Sphingomonadales    | 0.16b       |   | 1.53 ± 0.3b |   | 0.27a       |   | 1.17 ± 0.3b |   | 0.27b  |   | 0.36b       |   |
|                     | 1.08        | ± | 1.12        | ± |             |   | 2.06        | ± | 2.03   | ± |             |   |
| Chitinophagales     | 0.47b       |   | 0.34b       |   | 4.17 ± 0.3a |   | 0.44b       |   | 0.57b  |   | 2.83 ± 0.5b |   |
|                     | 1.01        | ± | 0.86        | ± | 0.83        | ± | 0.61        | ± | 0.46   | ± | 0.59        | ± |
| Caulobacterales     | 0.36a       |   | 0.2ab       |   | 0.43ab      |   | 0.25b       |   | 0.71b  |   | 0.26b       |   |
|                     | 0.86        | ± | 1.44        | ± | 1.46        | ± | 1.25        | ± | 2.97   | ± | 1.69        | ± |
| Gaiellales          | 0.27c       |   | 0.2bc       |   | 0.64bc      |   | 0.82ab      |   | 0.44a  |   | 0.29ab      |   |
|                     | 0.44        | ± |             |   | 1.44        | ± |             |   | 1.93   | ± | 1.6         | ± |
| Cytophagales        | 0.18b       |   | 0.75 ± 0.2b |   | 0.37a       |   | 2.22 ± 0.3a |   | 0.4a   |   | 0.16ab      |   |

---
